# Supplementary material for: Effect of Impulsivity Traits on Food Choice within a Nudging Intervention
Source: PubMed Central journal article supplement (PMC7285079; doi:10.3390/nu12051402), 2020-05-14
Supplement: nutrients-12-01402-s001.pdf [file nutrients-12-01402-s001.pdf]

## Supplementary Material - Appendix A

Complete questionnaire:

### Welcome to our study

**Thank you for participating! Please follow the instructions below:**

**STEP 1:** Fill out the attached consent form and keep a copy for yourself.

**STEP 2:** Fill out section #1, #2, and #3.

**STEP 3:** Eat! Please remember to check in your bracelet every time before serving yourself at each different food section. You are welcome to eat as much as you like.

**STEP 4:** After finishing your meal, please fill out section #4 and hand it in to one of us.

---

#### Section #1: BEFORE eating

1. What is your gender?
  - Female
  - Male
2. How old are you?  
\_\_\_\_\_
3. What is your occupation?
  - Student
  - Employed
  - Unemployed
4. What is your highest level of education?
  - High school or lower
  - Bachelor
  - Master degree

- PhD or higher

5. How tall are you (in cm)?

\_\_\_\_\_

6. How much do you weigh (in kg)? If you do not know the exact answer, you just write an estimate.

\_\_\_\_\_

7. How would you classify yourself in terms of your food consumption?

- Omnivore
- Flexitarian
- Vegetarian
- Pescetarian
- Vegan
- I do not know

8. Have you changed any of the following habits in the last two months: diet, smoking or exercising?

- Yes
- No

## Section #2 - BEFORE eating

Below are a number of statements that describe ways in which people act and think. For each statement, please indicate how much you agree or disagree with the statement. If you **Agree Strongly** circle **1**, if you **Agree Somewhat** circle **2**, if you **Disagree Somewhat** circle **3**, and if you **Disagree Strongly** circle **4**. Be sure to indicate your agreement or disagreement for every statement below.

|                                                                                                                      | Agree Strongly | Agree Somewhat | Disagree Somewhat | Disagree Strongly |
|----------------------------------------------------------------------------------------------------------------------|----------------|----------------|-------------------|-------------------|
| 1. I generally like to see things through to the end.                                                                | 1              | 2              | 3                 | 4                 |
| 2. My thinking is usually careful and purposeful.                                                                    | 1              | 2              | 3                 | 4                 |
| 3. When I am in a great mood, I tend to get into situations that could cause me problems.                            | 1              | 2              | 3                 | 4                 |
| 4. Unfinished tasks really bother me.                                                                                | 1              | 2              | 3                 | 4                 |
| 5. I like to stop and think things over before I do them.                                                            | 1              | 2              | 3                 | 4                 |
| 6. When I feel bad, I will often do things I later regret in order to make myself feel better now.                   | 1              | 2              | 3                 | 4                 |
| 7. Once I get going on something I hate to stop.                                                                     | 1              | 2              | 3                 | 4                 |
| 8. Sometimes when I feel bad, I can't seem to stop what I am doing even though it is making me feel worse.           | 1              | 2              | 3                 | 4                 |
| 9. I quite enjoy taking risks.                                                                                       | 1              | 2              | 3                 | 4                 |
| 10. I tend to lose control when I am in a great mood.                                                                | 1              | 2              | 3                 | 4                 |
| 11. I finish what I start.                                                                                           | 1              | 2              | 3                 | 4                 |
| 12. I tend to value and follow a rational, "sensible" approach to things.                                            | 1              | 2              | 3                 | 4                 |
| 13. When I am upset I often act without thinking                                                                     | 1              | 2              | 3                 | 4                 |
| 14. I welcome new and exciting experiences and sensations, even if they are a little frightening and unconventional. | 1              | 2              | 3                 | 4                 |
| 15. When I feel rejected, I will often say things that I later regret.                                               | 1              | 2              | 3                 | 4                 |
| 16. I would like to learn to fly an airplane                                                                         | 1              | 2              | 3                 | 4                 |
| 17. Others are shocked or worried about the things I do when I am feeling very excited.                              | 1              | 2              | 3                 | 4                 |

|                                                                                 |   |   |   |   |
|---------------------------------------------------------------------------------|---|---|---|---|
| 18. I would enjoy the sensation of skiing very fast down a high mountain slope. | 1 | 2 | 3 | 4 |
| 19. I usually think carefully before doing anything                             | 1 | 2 | 3 | 4 |
| 20. I tend to act without thinking when I am really excited                     | 1 | 2 | 3 | 4 |

### Section #3: BEFORE eating

Please answer these questions BEFORE you start to eat.

9. **How hungry do you feel now?** Please circle a number on the scale below.

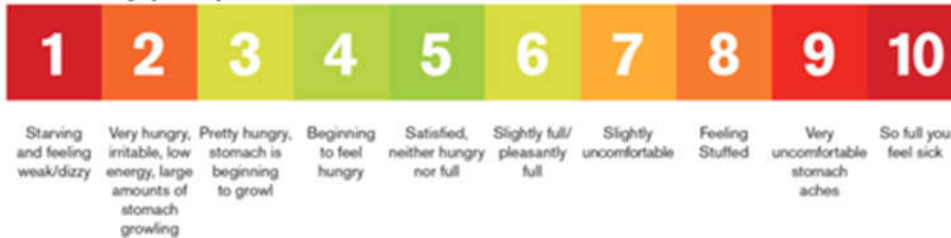

10. **How much do you think you can eat?** Please indicate how much you can eat on a scale of 1 to 10, from **nothing at all = 1** to **a lot = 10**. Please circle a number on the scale below.

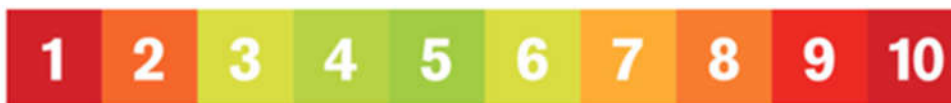

### Section #4: AFTER eating

Please answer these questions AFTER you have finished eating.

11. **How satiated are you?** Please circle a number on the scale below.

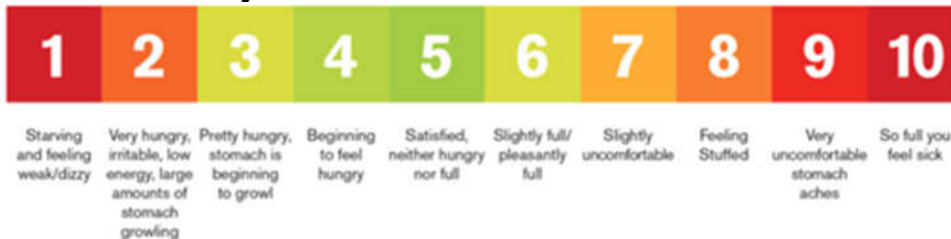

12. **How much did you like the food available at the buffet?** Please indicate how much you liked the food on a scale of 1 to 10, from **I didn't like it at all = 1** to **I liked it a lot = 10**. Please circle a number on the scale below.

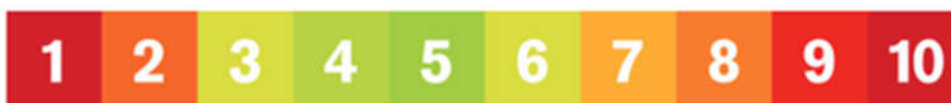

Thank you for your time.

Have a nice day!

**Supplementary Material - Appendix B**

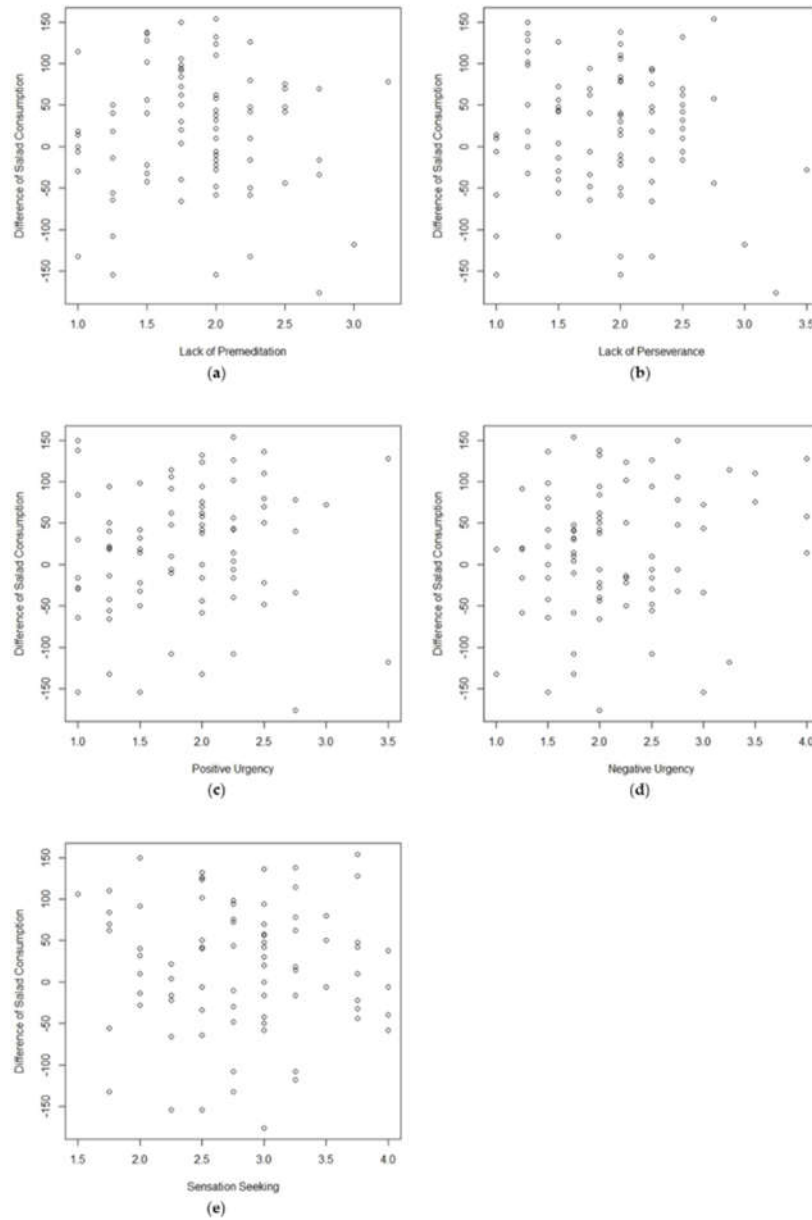

**Figure B1.** Scatter plots of each impulsivity trait score VS the difference of salad consumption (g) between lunch settings; (a) Lack of Premeditation; (b) Lack of Perseverance; (c) Positive Urgency; (d) Negative Urgency; (e) Sensation Seeking.

**Table B1.** Energy content for each ingredient of the meal components. Retrieved from Matportalen and from some of the product's nutrition labels

| <b>Ingredients</b> | <b>Energy<br/>(kcal)/100g</b> |
|--------------------|-------------------------------|
| Pasta              | 150                           |
| Olive oil          | 889                           |
| Cucumber           | 10                            |
| Tomato             | 18                            |

|               |     |
|---------------|-----|
| Zucchini      | 17  |
| Broccoli      | 30  |
| Cauliflower   | 23  |
| White cabbage | 32  |
| Lettuce       | 16  |
| Ground meat   | 200 |
| Mushrooms     | 22  |
| Eggplant      | 20  |
| Carrot        | 36  |
| *Tomato sauce | 27  |
| Sugar         | 400 |
| *Bouillon     | 293 |

\*Energy content taken from the product's nutrition label

**Table B2.** Recipe for tomato sauce

|                     | <b>g</b>    | <b>%</b>   |
|---------------------|-------------|------------|
| Canned tomato sauce | 3750        | 75         |
| Sugar               | 40          | 0.8        |
| Bouillon            | 10          | 0.2        |
| Water               | 1200        | 24         |
| <b>Total</b>        | <b>5000</b> | <b>100</b> |

**Table B3.** Calculations of energy content of meal components

|       | <b>Ingredients</b> | <b>% in formula</b> | <b>Quantity</b> | <b>Kcal</b>   |                                    |
|-------|--------------------|---------------------|-----------------|---------------|------------------------------------|
| Pasta | pasta              | 99                  | 99              | 148.5         |                                    |
|       | oil                | 1                   | 1               | 8.89          |                                    |
|       | <b>Total</b>       |                     |                 | <b>157.39</b> | <b>kcal for each 100g of pasta</b> |
| Salad | cucumber           | 0.16                | 16              | 0.80          |                                    |
|       | tomato             | 0.16                | 16              | 1.45          |                                    |
|       | zucchini           | 0.15                | 15              | 1.28          |                                    |
|       | broccoli           | 0.12                | 12              | 1.81          |                                    |

|                        |                         |          |            |              |                                     |
|------------------------|-------------------------|----------|------------|--------------|-------------------------------------|
|                        | cauliflower             | 0.12     | 12         | 1.39         |                                     |
|                        | white cabbage           | 0.2      | 20         | 3.22         |                                     |
|                        | lettuce                 | 0.09     | 9          | 0.72         |                                     |
|                        | <b>Total</b>            | <b>1</b> | <b>100</b> | <b>10.67</b> | <b>kcal for each 100g of salad</b>  |
| <b>Meat sauce</b>      |                         |          |            |              |                                     |
|                        | meat                    | 0.3      | 30         | 60           |                                     |
|                        | vegetables              | 0.2      | 20         |              |                                     |
|                        | broccoli                | 20       | 4          | 1.2          |                                     |
|                        | mushrooms               | 25       | 5          | 1.1          |                                     |
|                        | eggplant                | 25       | 5          | 1            |                                     |
|                        | carrot                  | 30       | 6          | 2.16         |                                     |
|                        |                         |          |            | <b>5.46</b>  |                                     |
|                        | sauce                   | 0.5      | 50         |              |                                     |
|                        | tomato sauce            | 75.00    | 37.50      | 10.13        |                                     |
|                        | sugar                   | 0.80     | 0.40       | 1.60         |                                     |
|                        | bouillon                | 0.20     | 0.10       | 0.29         |                                     |
|                        | water                   | 24.00    | 12.00      | 0.00         |                                     |
|                        |                         |          |            | <b>12.02</b> |                                     |
|                        | <b>Total meat sauce</b> |          |            | <b>77.48</b> | <b>for each 100 g of meat sauce</b> |
| <b>Vegetable sauce</b> |                         |          |            |              |                                     |
|                        |                         | 0.5      | 50         |              |                                     |
|                        | broccoli                | 20       | 10         | 3            |                                     |
|                        | mushrooms               | 25       | 12.5       | 2.75         |                                     |
|                        | vegetables eggplant     | 25       | 12.5       | 2.5          |                                     |
|                        | carrot                  | 30       | 15         | 5.4          |                                     |
|                        |                         |          |            | <b>13.65</b> |                                     |
|                        |                         | 0.5      | 50         |              |                                     |
|                        | tomato sauce            | 75.00    | 37.50      | 10.13        |                                     |

---

|       |                              |       |       |              |                                          |
|-------|------------------------------|-------|-------|--------------|------------------------------------------|
| sauce | sugar                        | 0.80  | 0.40  | 1.60         |                                          |
|       | bouillon                     | 0.20  | 0.10  | 0.29         |                                          |
|       | water                        | 24.00 | 12.00 | 0.00         |                                          |
|       |                              |       |       | <b>12.02</b> |                                          |
|       | <b>Total vegetable sauce</b> |       |       | <b>25.67</b> | <b>for each 100 g of vegetable sauce</b> |

---
